# Supplementary material
Source: PubMed Central journal article supplement (PMC8730783)

## Supporting Information

### Improving the Speed and Selectivity of Newborn Screening using Ion Mobility Spectrometry – Mass Spectrometry (IMS-MS)

James N. Dodds and Erin S. Baker

Department of Chemistry, North Carolina State University, Raleigh, North Carolina 27695,  
United States.

\* Corresponding Author Email: ebaker@ncsu.edu

#### *Comments on IM-MS Data presented in this Work*

In this supporting information we detail instrument settings used to collect IMS-MS data in this manuscript. Extended information for analyte drift times, and CCS reproducibility is included in the supplemental Excel Sheet ES1. We also include a list of NBS targets with molecular formula and CCS readily for import into Skyline should other researchers choose to utilize these values in their own experiments. Supplemental isomer separations are also included for steroids and method development information pertaining to the Agilent RapidFire SPE workflow.

#### **Table of Contents**

**P2** – Table S1 Supplemental instrument settings.

**P3** – Figure S1: PNNL Preprocessor settings.

**P4** – Figure S2, S3: HRdm settings and Skyline IMS illustration.

**P5** – Figure S4: Carnitine subclass trendlines.

**P6** – Figure S5: Steroid isomers (11 and 21-deoxycortisol and corticosterone).

**P7** – Figure S6: Steroid isomers (cortisone and aldosterone)

**P8** – Figure S7: Leu/Ile/Trans 4-OHP and CRE separations.

**P9** – Figure S8: SPE cartridge selectivity for the Agilent RapidFire.

**P10** – Figure S9: RapidFire reproducibility and normalization.

**P11** – Figure S10: RapidFire reproducibility for analytes noted in simulated NBS samples.

**Supporting Information Table S1:** Instrumental parameters flow injection analysis (FIA), automated SPE using the Agilent RapidFire 365, and IMS-MS settings the Agilent 6560.

*Abbreviations:* FA – Formic Acid, AF – Ammonium Formate

### Flow Injection Analysis (FIA)

| Parameter        | Value            | Descriptor | Time (min)  | % B |
|------------------|------------------|------------|-------------|-----|
| Temperature      | 30               | Celsius    | 0 – 1.5 min | 50  |
| Injection Volume | 2                | uL         |             |     |
| Flow Rate        | 0.2              | mL/min     |             |     |
| Mobile Phase (A) | H <sub>2</sub> O | 0.1% FA    |             |     |
| Mobile Phase (B) | ACN              | – both A/B |             |     |

### RapidFire 365 (SPE)

| Parameter                       | Value      | Descriptor                                                                                     |
|---------------------------------|------------|------------------------------------------------------------------------------------------------|
| <b>State (Sequence Timings)</b> |            | <b>Cartridge:</b> C18/C4/C8/Cyano/Hypercarb/Phenyl                                             |
| Aspirate                        | 600 ms     | Pump 1: H <sub>2</sub> O (100%)                                                                |
| Load/Wash                       | 3000 ms    | Pump 2: H <sub>2</sub> O + 0.1% FA (100%)                                                      |
| Extra Wash                      | 0 ms       | Pump 3: ACN + 0.1% FA (100%)                                                                   |
| Elute                           | 6000 ms    | <b>Cartridge:</b> HILIC                                                                        |
| Requilibrate                    | 1000 ms    | Pump 1: 9:1 ACN/H <sub>2</sub> O - 20 mM FA, pH3 (100%)                                        |
| Flow Rate to MS                 | 0.6 mL/min | Pump 2: 9:1 ACN/H <sub>2</sub> O - 20 mM FA, pH3 (100%)                                        |
| 96 Deep Well Plate (Axygen)     |            | Pump 3: 9:1 ACN/H <sub>2</sub> O - 20 mM AF, pH3 (25%), H <sub>2</sub> O – 20 mM AF, pH3 (75%) |

### Agilent 6560 Settings

| Parameter              | Value     | Descriptor                  |
|------------------------|-----------|-----------------------------|
| <b>Source Settings</b> |           |                             |
| Gas Temperature        | 325       | Celsius                     |
| Drying Gas             | 11        | L/min                       |
| Nebulizer              | 15/45     | Flow Injection/RapidFire    |
| Sheath Gas Temp        | 350       | Celsius                     |
| Sheath Gas Flow        | 12        | L/min                       |
| Vcap                   | 4000      | V                           |
| Nozzle                 | 2000      | V                           |
| <b>IMS-MS Settings</b> |           |                             |
| Mass Range             | 50-1700   | m/z                         |
| Trap Fill Time         | 3900      | µs                          |
| Trap Release Time      | 100       | µs                          |
| Frame Rate             | 0.9       | Frames/sec                  |
| IM Transient Rate      | 18        | IM Transients/Frame         |
| Max Drift Time         | 60        | ms                          |
| TOF Transient Rate     | 600       | Transients/IM Transients    |
| Drift Tube Entrance    | 1574/1174 | V (Standard Multiplex/HRdm) |
| Drift Tube Exit        | 224       | V                           |
| Rear Funnel Entrance   | 217.5     | V                           |
| Rear Funnel Exit       | 45        | V                           |

**Supporting Information Figure S1:** Highlighted Settings utilized for demultiplexing IMS-MS data and data interpolation via the PNNL Preprocessor tool (v.2021.04.21), publicly available for download at <https://omics.pnl.gov/software/pnnl-preprocessor>. Settings utilized other than default (interpolation of 3 drift bins and minimal pulse coverage of 75%) are highlighted in purple.

Work Directory: D:\20201105\_AZ\_(HIL+)\_LowMassTune

Available Data Files (Total: 128)

| Data File Name                               | DriftBins | Mux    | Update Note | Path        |
|----------------------------------------------|-----------|--------|-------------|-------------|
| 1_1UPD_Isomers                               | 495       | 4 bits |             | D:\20201105 |
| 1_1UPD_Isomers.d.DeMP                        | 495       | n/a    |             | D:\20201105 |
| 1_1UPD_Isomers_Col2                          | 495       | 4 bits |             | D:\20201105 |
| 1_1UPD_Isomers_Col2.d.DeMP                   | 495       | n/a    |             | D:\20201105 |
| 2_Methylglutaryl_L_Carnitine                 | 495       | 4 bits |             | D:\20201105 |
| 2_Methylglutaryl_L_Carnitine.d.DeMP          | 495       | n/a    |             | D:\20201105 |
| 2_Methylglutaryl_L_Carnitine_Col2            | 495       | 4 bits |             | D:\20201105 |
| 2_Methylglutaryl_L_Carnitine_Col2.d.DeMP     | 495       | n/a    |             | D:\20201105 |
| 3_Hydroxy_Isovaleryl_L_Carnitine             | 495       | 4 bits |             | D:\20201105 |
| 3_Hydroxy_Isovaleryl_L_Carnitine.d.DeMP      | 495       | n/a    |             | D:\20201105 |
| 3_Hydroxy_Isovaleryl_L_Carnitine_Col2        | 495       | 4 bits |             | D:\20201105 |
| 3_Hydroxy_Isovaleryl_L_Carnitine_Col2.d.DeMP | 495       | n/a    |             | D:\20201105 |

Refresh Reset 128 data files loaded.

**Step 1: Data Compression and Interpolation**

- Keep minutes: 0 thru 0
- Compress frames: Every 1 frames become 1 frame
- Interpolate drift bins: 1 drift bin becomes 3 drift bins
- Compress drift bins: 1 drift bins become 1 drift bin

**Step 2 (a): Multiplexed Data: Demux, Smooth, Spike Rem.**

- Demultiplexing
  - Number of points input smoothing: drift (Savitzky-Golay): [5]
  - chromatography/infusion (moving average): 3
  - Minimum pulse coverage (%): 75
  - Resource use: High (maximum processor/memory usage)
- Moving Average Smoothing
  - m/z: drift: chromatography/infusion:
  - Number of points: not used 3 not used
- Signal Intensity Lower Threshold: counts 20
- Spike Removal: require 1 adjacent points per dimension (drift and m/z)

**Step 2 (b): Single Pulse Data: Smoothing, Spike Removal**

**Step 3: Saturation Repair**

**Step 4: Conversion to 3D/LCMS**

General Options

- Common Output Directory: D:\20201105\_AZ\_(HIL+)\_LowMassTune
- Export Frame Metadata and MS Periodic Actuals (original data file)
- # of files to process in parallel: 1
- Overwrite Existing Results

Restore Defaults Cancel Processing Process Data Files Close

**Supporting Information Figure S2:** Settings utilized for the High Resolution Demultiplexing (HRdm, v.2\_0\_B45E) process after feature extraction from IM-MS Browser, v. 10.0.

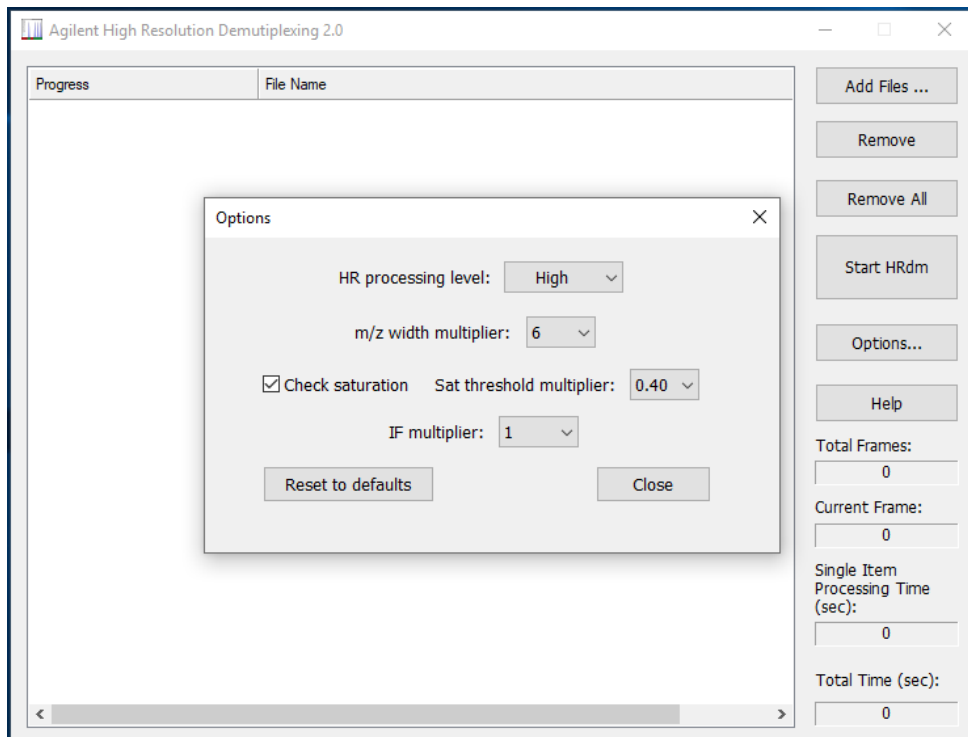

**Supporting Information Figure S3:** Representative illustration of Skyline mobility filtering of IMS-MS data. Here the sodiated adduct of inosine is spatially separated in  $m/z$  and drift time space from nearby chemical interferences based on the chemical formula and CCS value of the target ion. The literature CCS value is referenced from the work of Nichols *et. al.* Anal. Chem. **2018**, 24, 14484-14492. doi: 10.1021/acs.analchem.8b04322 using the same IMS-MS platform.

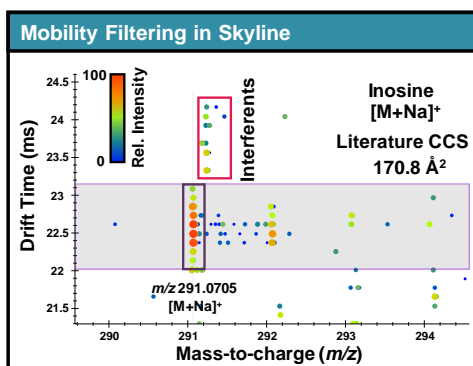

**Supplemental Figure S4.** Carnitine subclass trendlines observed for the standards utilized in this work. Hydroxylated and Trans-2 carnitines seem to be larger in CCS per  $m/z$  unit in comparison to the linear carnitine form. Iso-carnitines are typically smaller than their linear forms, likely a result of a more compact gas phase structure rather than an extended form. The dicarboxylic acid carnitines are by far the smallest in CCS per  $m/z$ , where the extra carboxylate group adds more mass, yet less length, than a linear  $\text{CH}_2$  addition as in the linear base carnitines. Similar trendlines have been noted with other chemical classes as discussed in the main text.

### Carnitine Subclass Trendlines

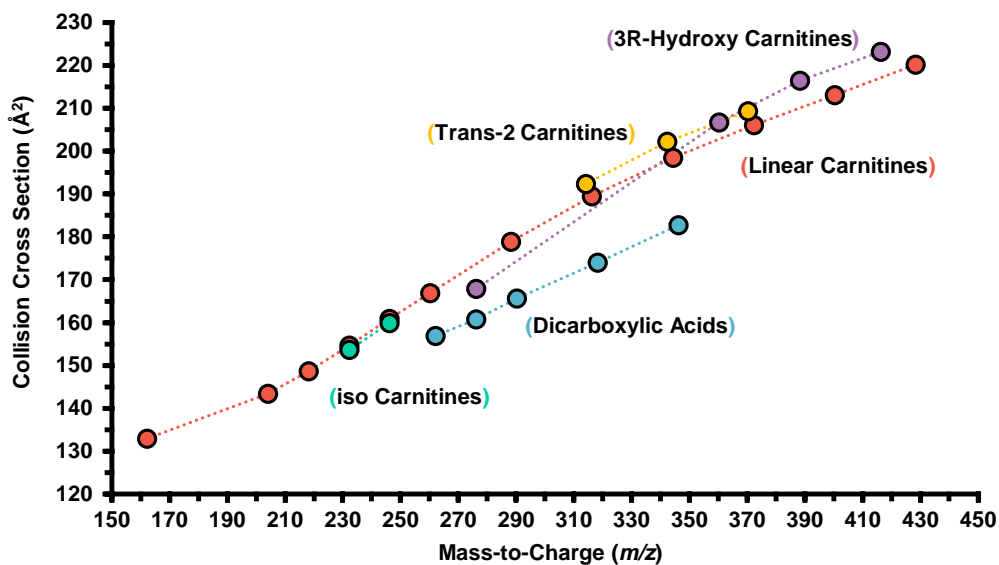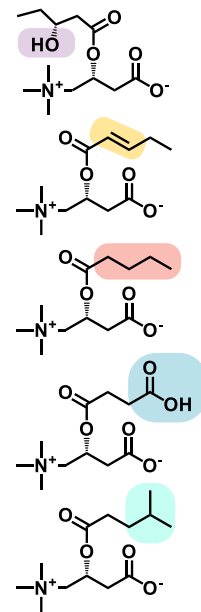

**Supplemental Figure S5.** Steroid isomers of  $C_{21}H_{30}O_4$ - Corticosterone added here, where a post processing artifact is noted in the middle pane for the three-component mixture. As the drift time does not correspond to the corticosterone standard (likely unresolved with 11-deoxycortisol) the current thought is that this peak is an artifact of the beta HRdm process and still being investigated.

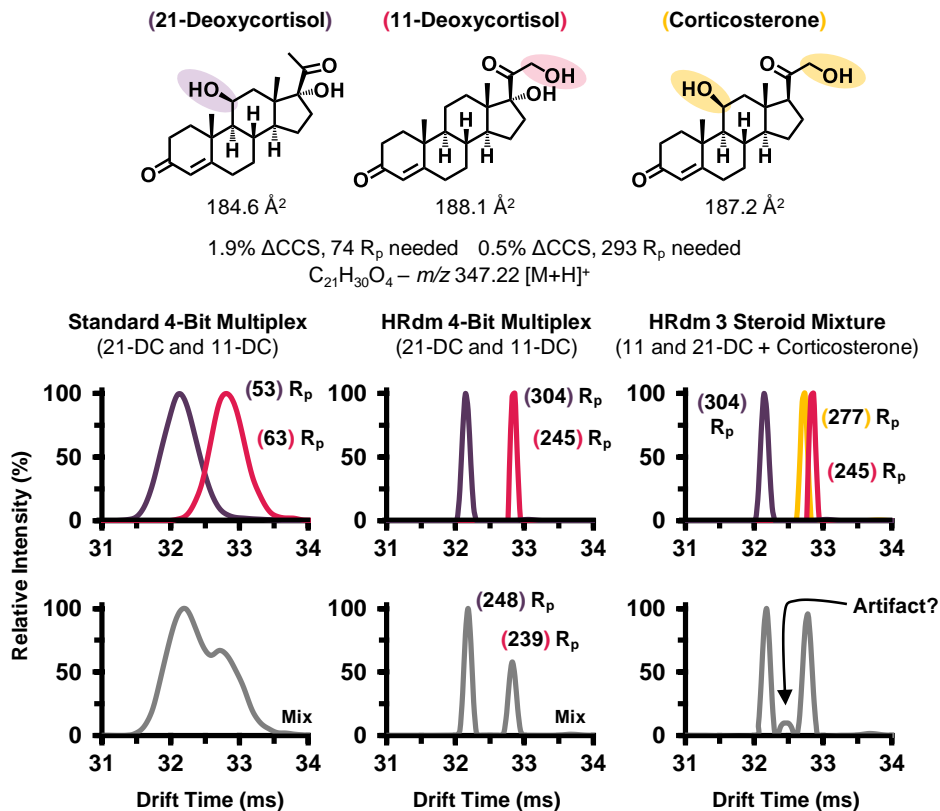

**Supplemental Figure S6.** Steroid isomers cortisone and aldosterone. While both analytes are resolvable by the standard 60 Rp using normal demultiplexing, HRdm provides interesting resolution of these isomers. Of note, aldosterone seems to possess two conformations as an individual standard (middle pane, green), which also suggested by the decreased resolving power (41) in “normal” mode. Though the right conformer has a very similar calculated CCS as cortisone (188.3 and 188.7 Å<sup>2</sup>, respectively), it would be theoretically possible to calculate the relative abundance of each isomer provide that the relative abundance of each aldosterone “conformer” is conserved in subsequent analyses.

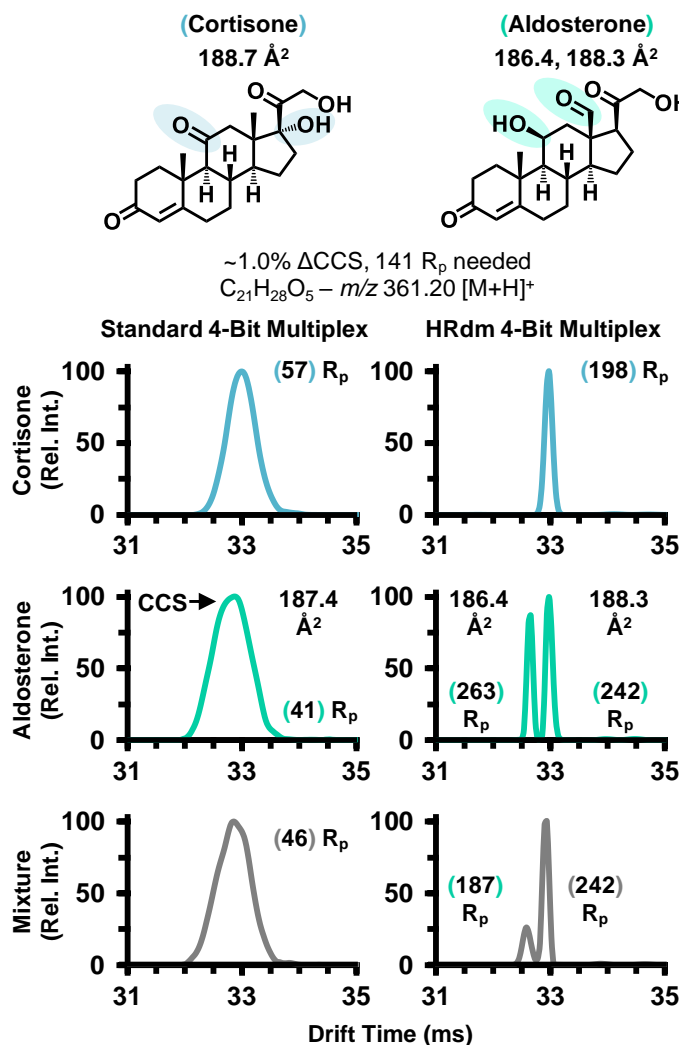

**Supplemental Figure S7.** Small molecule amino acids separations by HRdm. Our preliminary results working with the beta HRdm software suggest there are additional challenges for resolution enhancement when working with particularly small analytes (<150 Da). These ions possess high mobilities (low drift times), and hence do not possess as many points across the peak for the HRdm enhancement process compared to larger molecular ions, and hence the observed  $R_p$  from small ions is typically ~80 or so compared to ~200 for larger analytes.

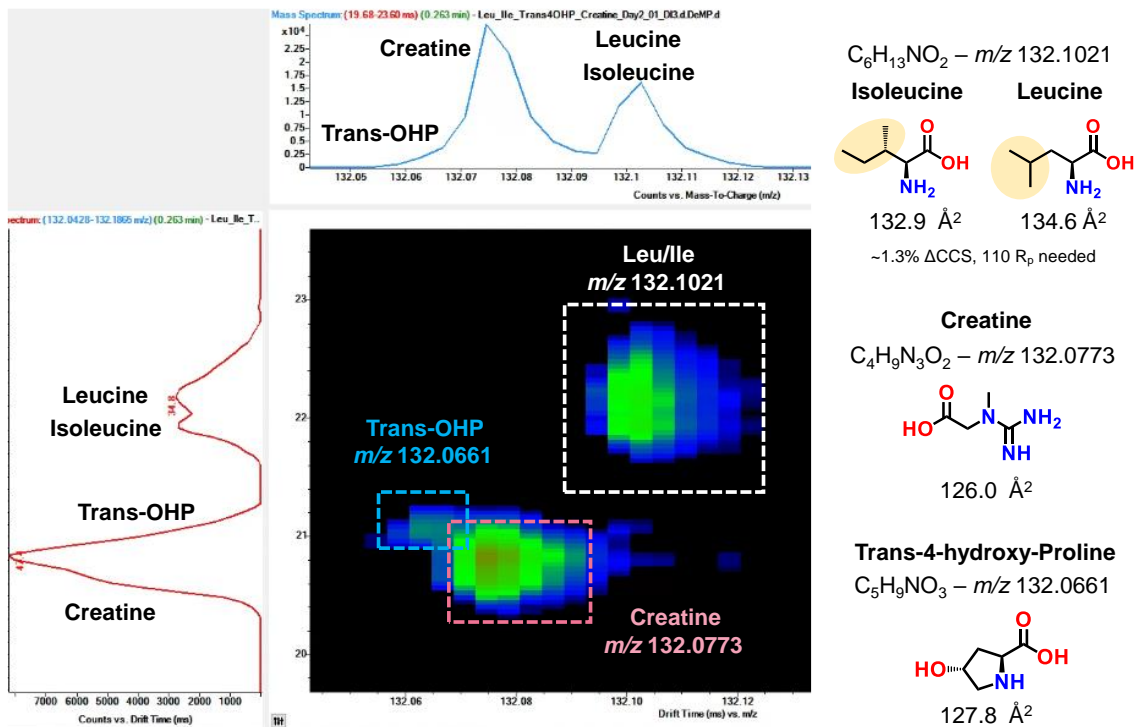



**Supplemental Figure S8.** SPE cartridge selectivity based on analyte polarity. A standard mixture comprised of both amino acids and carnitines of various chain lengths were assessed by each SPE cartridge. Results suggest that sequential sampling using both the HILIC and Hypercarb cartridges (polar and nonpolar analytes, respectively) should provide sufficient coverage for assessment of most analytes.

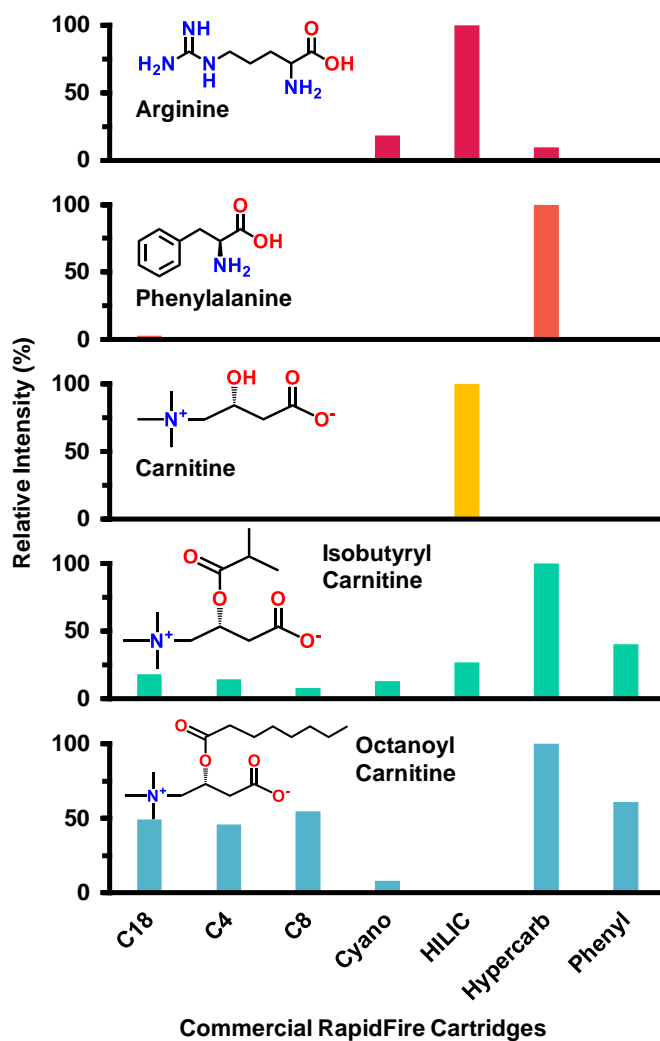

**Supplemental Figure S9.** Extraction reproducibility using sequential bovine blood spots made from the same pooled sample. While run-to-run variation could exceed 20% RSD, normalization with isotopically labeled standards (IS, here carnitine-*d*3) helped correct for ion suppression effects (from blood and filter paper) and variations in sample aspiration (similar to injection volume) from the RapidFire. Corrected peak areas typically were around 10% RSD for the preliminary tests demonstrated in this work.

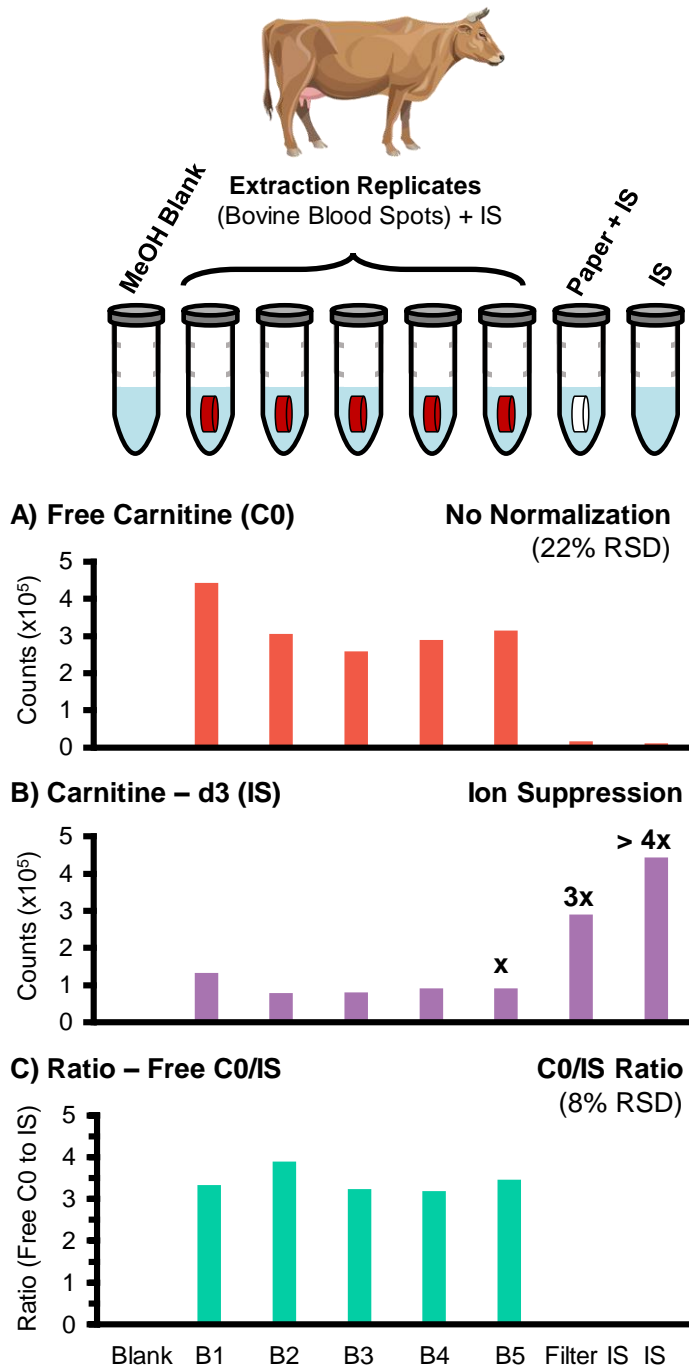

**Supplemental Figure S10.** Extraction replicates of simulated NBS samples using bovine and sheep blood. Relative abundance for each NBS target is provided in a bar graph along with the preferred SPE cartridge.

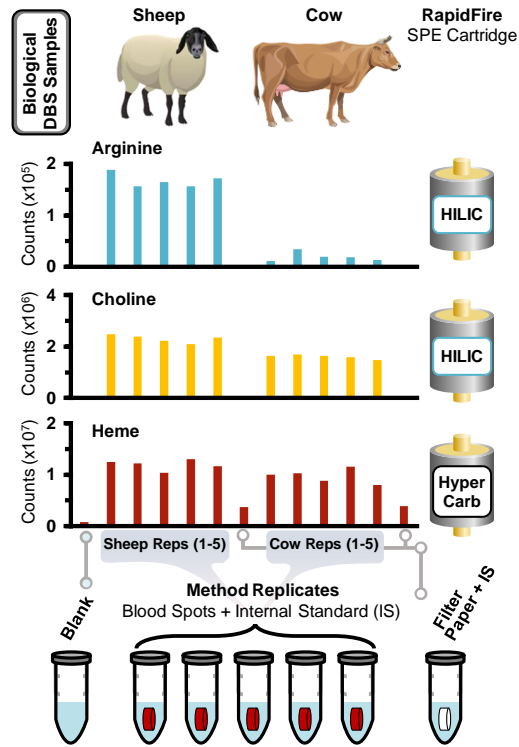

Supplement: NIHMS1764502-supplement-Supplementary_Information.pdf [file NIHMS1764502-supplement-Supplementary_Information.pdf]
